# Supplementary material for: Maternal Intake of n-3 Polyunsaturated Fatty Acids During Pregnancy Is Associated With Differential Methylation Profiles in Cord Blood White Cells
Source: Front Genet. 2019 Oct 25;10:1050. doi: 10.3389/fgene.2019.01050 (PMC6824245; doi:10.3389/fgene.2019.01050)
Supplement: Supplementary file 6 [file Table_6.xlsx]

## Sheet: low n-3_vs_high n-3 PUFAs(A)
Supplementary Table 6. A
Significantly differentially methylated genes in gene bodies in Low n-3 PUFAs vs High n-3 PUFAs
id	Chromosome	Start	End	Gene list	mean.mean.diff	pvalue
ENSG00000236242	chr13	109816250	109853831	MYO16-AS1	-0.0565605	0.00541201
ENSG00000234030	chr21	45203004	45203454	TMEM97P1	0.0184961	0.0108097
ENSG00000221837	chr21	46047040	46048294	KRTAP10-9	0.0278528	0.0114923
ENSG00000206688	chr15	25330532	25330623	SNORD116-18	0.0138987	0.011703
ENSG00000176253	chr14	20502003	20502919	OR4K13	0.0106037	0.0125939
ENSG00000211767	chr7	142494531	142494579	TRBJ2-3	0.00766167	0.0147948
ENSG00000260347	chr16	48530901	48532512	MOCS1P1	0.00618436	0.0161653
ENSG00000122728	chr9	32629452	32635667	TAF1L	0.0183761	0.0167117
ENSG00000207263	chr15	25327915	25328006	SNORD116-16	0.00976825	0.0204436
ENSG00000245105	chr12	9217773	9220651	A2M-AS1	-0.0314135	0.0228003
ENSG00000183130	chr1	248789420	248790491	OR2T11	0.0110159	0.0241625
ENSG00000230246	chr9	90529408	90538572	SPATA31C1	0.0567017	0.0251904
ENSG00000109205	chr4	71062213	71070293	ODAM	0.0133093	0.0256299
ENSG00000214851	chr12	9208182	9217666	LINC00612	-0.0374462	0.0267376
ENSG00000167799	chr11	67395409	67397401	NUDT8	0.0061933	0.0273341
ENSG00000177234	chr10	122357721	122359629	C10orf85	0.00907781	0.0282733
ENSG00000176555	chr11	48327775	48328704	OR4S1	0.0165444	0.0294338
ENSG00000205649	chr4	70894130	70902255	HTN3	0.0103236	0.0297551
ENSG00000259144	chr14	21188901	21191286	RANBP20P	0.00517327	0.0306124
ENSG00000158901	chr20	44179792	44207965	WFDC8	0.0126331	0.0307115
ENSG00000234359	chr7	45431225	45431804	ELK1P1	0.0193261	0.0310617
ENSG00000198445	chr22	17071667	17073700	CCT8L2	0.0135812	0.0313619
ENSG00000248213	chr4	119557056	119559937	CICP16	0.0199635	0.0314671
ENSG00000163518	chr1	157543539	157567870	FCRL4	0.0111744	0.0315769
ENSG00000198283	chr11	58274648	58275578	OR5B21	0.00411348	0.0323396
ENSG00000204805	chr9	44997777	44999352	FAM27E4	0.0263393	0.0348783
ENSG00000167916	chr17	38854243	38860002	KRT24	0.00920402	0.0351217
ENSG00000232401	chr21	43136596	43137740	LINC00112	0.00864653	0.0355326
ENSG00000186117	chr11	55578854	55579952	OR5L1	0.0134192	0.0359243
ENSG00000268194	chr2	121221911	121223697	LINC01101	0.0440115	0.0368936
ENSG00000187537	chr14	19983559	20020272	POTEM	0.011683	0.0375583
ENSG00000164825	chr8	6728097	6735544	DEFB1	-0.0223602	0.0379735
ENSG00000231599	chr1	187412738	187446354	LINC01037	0.00498619	0.0381875
ENSG00000207702	chr15	31357235	31357344	MIR211	0.00625132	0.0383911
ENSG00000119737	chr2	54080050	54087126	GPR75	-0.0119757	0.0395509
ENSG00000130950	chr9	97077605	97090926	NUTM2F	0.0269052	0.0409737
ENSG00000251441	chr4	113277291	113280975	RTEL1P1	0.00951029	0.0411985
ENSG00000204983	chr7	142457319	142460923	PRSS1	0.00680643	0.0412859
ENSG00000230528	chr17	20339650	20350557	NOS2P3	0.0103061	0.0414722
ENSG00000255298	chr11	124134723	124135763	OR8G5	0.00891344	0.0430982
ENSG00000207181	chr1	235291118	235291252	SNORA14B	0.0140577	0.0432946
ENSG00000212387	chr4	187422263	187422369	RNU6-1055P	-0.0353251	0.0433852
ENSG00000233303	chr3	194815317	194816786	XXYLT1-AS1	-0.0146015	0.0450818
ENSG00000169208	chr14	22037934	22038875	OR10G3	0.010245	0.0452918
ENSG00000267151	chr17	41522075	41528568	MIR2117	0.0152794	0.0454111
ENSG00000259134	chr15	95976324	96051076	LINC00924	0.0131452	0.0456431
ENSG00000224860	chr21	15196727	15197956	GXYLT1P2	0.0211598	0.0459941
ENSG00000184155	chr1	159504793	159505842	OR10J5	0.00692114	0.0460039
ENSG00000146666	chr7	47801074	47806370	LINC00525	0.0243213	0.0462083
ENSG00000171484	chr9	125390858	125391852	OR1B1	0.0180835	0.0462095
ENSG00000254727	chr11	86143140	86143617	PTP4A1P6	0.0122495	0.0462694
ENSG00000201085	chr4	189042685	189042788	RNU6-173P	0.0214953	0.0474146
ENSG00000224337	chr2	150177107	150177950	FAM8A3P	-0.0308629	0.0475833
ENSG00000224353	chr17	61584417	61597167	ACE3P	0.00958891	0.0476911
ENSG00000231009	chr10	43189819	43210023	CUBNP1	0.00965892	0.0481434
ENSG00000261190	chr16	52039399	52112386	C16orf97	0.00604334	0.0482558
ENSG00000148344	chr9	132500610	132515326	PTGES	0.0254732	0.0490223
ENSG00000188124	chr11	6789218	6790286	OR2AG2	0.00876294	0.0495319
ENSG00000143184	chr1	168545711	168551315	XCL1	0.0229732	0.0496514
ENSG00000268500	chr19
ENSG00000168925	chr16
ENSG00000258736	chr14
ENSG00000215187	chr9
ENSG00000215131	chr16
ENSG00000258397	chr15
ENSG00000227300	chr17
ENSG00000232803	chr20
ENSG00000249755	chr4
ENSG00000181958	chr11
ENSG00000231459	chr9
ENSG00000254761	chr11
ENSG00000207803	chr19
ENSG00000266701	chr17
ENSG00000103832	chr15
ENSG00000221323	chr12
ENSG00000254715	chr8
ENSG00000172365	chr11
ENSG00000197437	chr1
ENSG00000265692	chr17
ENSG00000230098	chr10
ENSG00000257534	chr12
ENSG00000248576	chr12
ENSG00000268869	chr1
ENSG00000215033	chr10
ENSG00000206013	chr11
ENSG00000226629	chr17
ENSG00000213153	chr11
ENSG00000142102	chr11
ENSG00000172208	chr11
ENSG00000171505	chr9
ENSG00000185433	chr21
ENSG00000261567	chr16
ENSG00000182645	chr10
ENSG00000170255	chr11
ENSG00000116031	chr2
ENSG00000218819	chr2
ENSG00000226758	chr1
ENSG00000188611	chr10
ENSG00000257771	chr12
ENSG00000258119	chr12
ENSG00000216331	chr6
ENSG00000258817	chr11
ENSG00000169877	chr16
ENSG00000181984	chr15
ENSG00000196834	chr2
ENSG00000214132	chr5
ENSG00000196966	chr6
ENSG00000228314	chr21
ENSG00000183024	chr17
ENSG00000224484	chr7
ENSG00000204788	chr9
ENSG00000258794	chr12
ENSG00000232586	chr1
ENSG00000165202	chr9
ENSG00000267624	chr17
ENSG00000226790	chr10
ENSG00000207788	chr19
ENSG00000197617	chr1
ENSG00000208001	chr14
ENSG00000169248	chr4
ENSG00000225846	chr4
ENSG00000256453	chr5
ENSG00000200354	chr20
ENSG00000236664	chr2
ENSG00000171136	chr19
ENSG00000233044	chr6
ENSG00000236772	chr20
ENSG00000270495	chr5
ENSG00000248367	chr5
ENSG00000201331	chr15
ENSG00000254608	chr8
ENSG00000231383	chr3
ENSG00000258767	chr15
ENSG00000231403	chr2
ENSG00000266958	chr19
ENSG00000207797	chr18
ENSG00000247213	chr12
ENSG00000200593	chr15
ENSG00000224277	chr22
ENSG00000254126	chr2
ENSG00000249264	chr4
ENSG00000223928	chr10
ENSG00000266753	chr17
ENSG00000230526	chr10
ENSG00000258789	chr14
ENSG00000269410	chr19
ENSG00000102891	chr16
ENSG00000259445	chr15
ENSG00000255815	chr9
ENSG00000183313	chr11
ENSG00000254415	chr19
ENSG00000181733	chr19
ENSG00000207959	chr14
ENSG00000224481	chr1
ENSG00000232131	chr6
ENSG00000263834	chr5
ENSG00000233558	chr6
ENSG00000256422	chr11
ENSG00000262920	chr17
ENSG00000225208	chr10
ENSG00000267473	chr19
ENSG00000234721	chr17
ENSG00000208038	chr12
ENSG00000234186	chr16
ENSG00000165188	chr9
ENSG00000105205	chr19
ENSG00000259359	chr15
ENSG00000261623	chr16
ENSG00000105501	chr19
ENSG00000207600	chr8
ENSG00000271792	chr5
ENSG00000272628	chr8
ENSG00000249808	chr5
ENSG00000150244	chr11
ENSG00000250884	chr4
ENSG00000250855	chr4
ENSG00000248432	chr4
ENSG00000229262	chr20
ENSG00000228623	chr9
ENSG00000205439	chr21
ENSG00000263232	chr16
ENSG00000225693	chr9
ENSG00000230970	chr3
ENSG00000181800	chr10
ENSG00000188817	chr3
ENSG00000243433	chr7
ENSG00000223829	chr7
ENSG00000249266	chr5
ENSG00000186466	chr9
ENSG00000125255	chr13
ENSG00000254927	chr11
ENSG00000182584	chr20
ENSG00000221836	chr7
ENSG00000250101	chr5
ENSG00000196126	chr6
ENSG00000215398	chr14
ENSG00000234156	chr9
ENSG00000249129	chr5
ENSG00000176893	chr11
ENSG00000259481	chr15
ENSG00000173262	chr12
ENSG00000230174	chr6
ENSG00000257877	chr12
ENSG00000230013	chr9
ENSG00000181961	chr11
ENSG00000225643	chr1
ENSG00000259884	chr12
ENSG00000259555	chr15
ENSG00000267045	chr19
ENSG00000229686	chr20
ENSG00000260792	chr14
ENSG00000248121	chr17
ENSG00000260341	chr16
ENSG00000091262	chr16
ENSG00000172519	chr19
ENSG00000124391	chr16
ENSG00000234768	chr6
ENSG00000179420	chr7
ENSG00000272900	chr11
ENSG00000250182	chr5
ENSG00000237064	chr7
ENSG00000196661	chr11
ENSG00000184478	chr11
ENSG00000221989	chr7
ENSG00000269356	chr13
ENSG00000215802	chr1
ENSG00000263429	chr17
ENSG00000248173	chr4
ENSG00000109321	chr4
ENSG00000234791	chr11
ENSG00000249096	chr4
ENSG00000229164	chr14
ENSG00000265766	chr18
ENSG00000235072	chr2
ENSG00000258582	chr16
ENSG00000267372	chr19
ENSG00000171916	chr17
ENSG00000231816	chr1
ENSG00000233421	chr1
ENSG00000125498	chr19
ENSG00000221957	chr19
ENSG00000207837	chr19
ENSG00000226659	chr10
ENSG00000226954	chr22
ENSG00000268866	chr19
ENSG00000172772	chr11
ENSG00000183560	chr11
ENSG00000261663	chr16
ENSG00000269927	chr14
ENSG00000212498	chr20
ENSG00000115956	chr2
ENSG00000242107	chr3
ENSG00000214921	chr17
ENSG00000105246	chr19
ENSG00000238262	chr11
ENSG00000234512	chr1
ENSG00000244247	chr3
ENSG00000235238	chr6
ENSG00000214043	chr12
ENSG00000243802	chr11
ENSG00000188056	chr6
ENSG00000231394	chr7
ENSG00000207827	chr6
ENSG00000207607	chr1
ENSG00000186092	chr1
ENSG00000137440	chr4
ENSG00000231346	chr1
ENSG00000230023	chr1
ENSG00000255148	chr1
ENSG00000199038	chr11
ENSG00000236360	chr1
ENSG00000236171	chr10
ENSG00000254530	chr11
ENSG00000264435	chr17
ENSG00000237374	chr2
ENSG00000254263	chr8
ENSG00000111801	chr6
ENSG00000167098	chr20
ENSG00000188536	chr16
ENSG00000197262	chr17
ENSG00000181935	chr11
ENSG00000151079	chr12
ENSG00000204188	chr6
ENSG00000227242	chr1
ENSG00000260506	chr2
ENSG00000260086	chr16
ENSG00000267520	chr2
ENSG00000223572	chr15
ENSG00000264914	chr17
ENSG00000270228	chr4
ENSG00000272036	chr11
ENSG00000264431	chr17
ENSG00000232457	chr17
ENSG00000174939	chr16
ENSG00000180934	chr11
ENSG00000269071	chr5
ENSG00000214259	chr16
ENSG00000231991	chr9
ENSG00000226281	chr6
ENSG00000256073	chr21
ENSG00000184140	chr15
ENSG00000242775	chr3
ENSG00000235760	chr2
ENSG00000229944	chr17
ENSG00000253154	chr8
ENSG00000234190	chr1
ENSG00000273172	chr17
ENSG00000234085	chr7
ENSG00000248944	chr8
ENSG00000211520	chr2
ENSG00000268927	chr16
ENSG00000202142	chr14
ENSG00000204700	chr6
ENSG00000259620	chr15
ENSG00000184586	chr21
ENSG00000256386	chr21
ENSG00000256276	chr12
ENSG00000095261	chr9
ENSG00000181123	chr22
ENSG00000231671	chr1
ENSG00000254044	chr4
ENSG00000254153	chr8
ENSG00000233316	chr21
ENSG00000232685	chr13
ENSG00000244945	chr5
ENSG00000231660	chr3
ENSG00000234025	chr6
ENSG00000266733	chr17
ENSG00000206176	chr22
ENSG00000263424	chr18
ENSG00000148483	chr10
ENSG00000272593	chr9
ENSG00000272108	chr5
ENSG00000260521	chr15
ENSG00000227712	chr1
ENSG00000248300	chr4
ENSG00000272458	chr14
ENSG00000224500	chr10
ENSG00000225032	chr9
ENSG00000215486	chr13
ENSG00000259300	chr15
ENSG00000198796	chr18
ENSG00000265660	chr8
ENSG00000255410	chr11
ENSG00000233821	chr13
ENSG00000255734	chr12
ENSG00000258425	chr14
ENSG00000237999	chr9
ENSG00000238142	chr1
ENSG00000211581	chr1
ENSG00000259998	chr14
ENSG00000231301	chr6
ENSG00000207166	chr19
ENSG00000175509	chr2
ENSG00000207875	chr22
ENSG00000248901	chr5
ENSG00000226933	chr3
ENSG00000228703	chr1
ENSG00000229613	chr9
ENSG00000250517	chr12
ENSG00000259652	chr15
ENSG00000211845	chr14
ENSG00000261766	chr16
ENSG00000171671	chr11
ENSG00000258171	chr12
ENSG00000224132	chr2
ENSG00000226212	chr7
ENSG00000106538	chr7
ENSG00000196593	chr13
ENSG00000237159	chr9
ENSG00000233862	chr2
ENSG00000255582	chr14
ENSG00000211792	chr14
ENSG00000266513	chr18
ENSG00000234188	chr6
ENSG00000169488	chr14
ENSG00000226808	chr10
ENSG00000213774	chr2
ENSG00000272161	chr1
ENSG00000205176	chr8
ENSG00000160181	chr21
ENSG00000250733	chr8
ENSG00000204513	chr1
ENSG00000235968	chr2
ENSG00000231873	chr3
ENSG00000122136	chr9
ENSG00000196927	chr16
ENSG00000231877	chr1
ENSG00000205571	chr5
ENSG00000230319	chr22
ENSG00000261143	chr15
ENSG00000232386	chr15
ENSG00000125734	chr19
ENSG00000244752	chr22
ENSG00000260495	chr16
ENSG00000215562	chr21
ENSG00000163354	chr1
ENSG00000139572	chr12
ENSG00000220908	chr6
ENSG00000255210	chr11
ENSG00000259446	chr15
ENSG00000121691	chr11
ENSG00000241345	chr7
ENSG00000198250	chr10
ENSG00000187922	chr9
ENSG00000262663	chr17
ENSG00000128322	chr22
ENSG00000261744	chr16
ENSG00000242795	chr3
ENSG00000235354	chr7
ENSG00000258698	chr14
ENSG00000102962	chr16
ENSG00000207739	chr5
ENSG00000229754	chr2
ENSG00000221882	chr17
ENSG00000223559	chr7
ENSG00000261269	chr5
ENSG00000204684	chr20
ENSG00000248607	chr3
ENSG00000168260	chr14
ENSG00000227925	chr1
ENSG00000189223	chr2
ENSG00000179627	chr14
ENSG00000249228	chr4
ENSG00000226180	chr16
ENSG00000112761	chr6
ENSG00000105392	chr19
ENSG00000204918	chr13
ENSG00000232698	chr21
ENSG00000251637	chr11
ENSG00000165125	chr7
ENSG00000235664	chr7
ENSG00000229969	chr10
ENSG00000077498	chr11
ENSG00000229457	chr2
ENSG00000158201	chr18
ENSG00000273179	chr4
ENSG00000189134	chr6
ENSG00000181323	chr17
ENSG00000231246	chr1
ENSG00000254267	chr8
ENSG00000130035	chr12
ENSG00000169495	chr8
ENSG00000242049	chr3
ENSG00000259361	chr15
ENSG00000215900	chr1
ENSG00000177553	chr1
ENSG00000199059	chr1
ENSG00000159763	chr7
ENSG00000257012	chr11
ENSG00000258713	chr20
ENSG00000258808	chr14
ENSG00000197849	chr11
ENSG00000236981	chr11
ENSG00000145908	chr5
ENSG00000253179	chr11
ENSG00000256943	chr12
ENSG00000251655	chr12
ENSG00000220418	chr6
ENSG00000234290	chr5
ENSG00000224879	chr2
ENSG00000266718	chr17
ENSG00000069764	chr16
ENSG00000253711	chr8
ENSG00000267957	chr10
ENSG00000259607	chr8
ENSG00000250990	chr7
ENSG00000177725	chr8
ENSG00000253355	chr8
ENSG00000243085	chr9
ENSG00000137033	chr9
ENSG00000175619	chr11
ENSG00000260326	chr16
ENSG00000174837	chr19
ENSG00000254607	chr11
ENSG00000180481	chr12
ENSG00000197706	chr12
ENSG00000232230	chr10
ENSG00000207652	chr13
ENSG00000236051	chr13
ENSG00000182634	chr11
ENSG00000132793	chr20
ENSG00000223759	chr1
ENSG00000236318	chr7
ENSG00000180988	chr11
ENSG00000249196	chr12
ENSG00000257198	chr9
ENSG00000204663	chr20
ENSG00000187472	chr6
ENSG00000230266	chr3
ENSG00000272482	chr1
ENSG00000072080	chr2
ENSG00000258737	chr14
ENSG00000249035	chr5
ENSG00000176495	chr11
ENSG00000235172	chr5
ENSG00000135973	chr2
ENSG00000154654	chr21
ENSG00000248733	chr5
ENSG00000260483	chr15
ENSG00000198077	chr19
ENSG00000219492	chr4
ENSG00000175967	chr6
ENSG00000238022	chr1
ENSG00000226965	chr7
ENSG00000230795	chr6
ENSG00000105251	chr19
ENSG00000266605	chr18
ENSG00000253947	chr5
ENSG00000240014	chr4
ENSG00000230294	chr12
ENSG00000184925	chr9
ENSG00000233369	chr7
ENSG00000249675	chr4
ENSG00000227438	chr21
ENSG00000225091	chr20
ENSG00000171889	chr9
ENSG00000227437	chr10
ENSG00000254863	chr11
ENSG00000102970	chr16
ENSG00000159289	chr15
ENSG00000261710	chr8
ENSG00000253315	chr5
ENSG00000226397	chr12
ENSG00000231748	chr10
ENSG00000226430	chr8
ENSG00000101442	chr20
ENSG00000261347	chr11
ENSG00000261175	chr16
ENSG00000250221	chr5
ENSG00000174788	chr19
ENSG00000272170	chr6
ENSG00000225637	chr21
ENSG00000272595	chr7
ENSG00000236497	chr1
ENSG00000124097	chr20
ENSG00000187045	chr22
ENSG00000232784	chr2
ENSG00000180919	chr11
ENSG00000134551	chr12
ENSG00000233405	chr13
ENSG00000258172	chr12
ENSG00000221977	chr14
ENSG00000214249	chr13
ENSG00000242220	chr21
ENSG00000249279	chr5
ENSG00000181718	chr11
ENSG00000188687	chr2
ENSG00000259504	chr15
ENSG00000223609	chr11
ENSG00000215704	chr1
ENSG00000176567	chr11
ENSG00000248816	chr4
ENSG00000171224	chr10
ENSG00000243772	chr19
ENSG00000172460	chr16
ENSG00000261086	chr15
ENSG00000235398	chr1
ENSG00000174667	chr19
ENSG00000196329	chr7
ENSG00000187726	chr11
ENSG00000169344	chr16
ENSG00000270302	chr4
ENSG00000255012	chr11
ENSG00000203837	chr10
ENSG00000170369	chr20
ENSG00000164816	chr8
ENSG00000227912	chr10
ENSG00000199012	chr14
ENSG00000181963	chr11
ENSG00000183643	chr15
ENSG00000231460	chr9
ENSG00000272941	chr7
ENSG00000268589	chr19
ENSG00000230523	chr1
ENSG00000180259	chr20
ENSG00000225308	chr7
ENSG00000163687	chr3
ENSG00000165471	chr10
ENSG00000261783	chr16
ENSG00000232551	chr1
ENSG00000234354	chr13
ENSG00000226453	chr6
ENSG00000232567	chr10
ENSG00000256553	chr14
ENSG00000227491	chr7
ENSG00000197786	chr11
ENSG00000237410	chr11
ENSG00000264016	chr17
ENSG00000226067	chr1
ENSG00000272808	chr15
ENSG00000100312	chr22
ENSG00000271709	chr2
ENSG00000172016	chr2
ENSG00000134640	chr11
ENSG00000181761	chr11
ENSG00000227838	chr22
ENSG00000268324	chr3
ENSG00000251164	chr6
ENSG00000241369	chr3
ENSG00000253942	chr8
ENSG00000149742	chr11
ENSG00000223788	chr2
ENSG00000260262	chr4
ENSG00000182035	chr20
ENSG00000089101	chr20
ENSG00000134757	chr18
ENSG00000223920	chr1
ENSG00000137731	chr11
ENSG00000260042	chr16
ENSG00000233635	chr17
ENSG00000227233	chr7
ENSG00000226662	chr1
ENSG00000119411	chr9
ENSG00000160862	chr7
ENSG00000249727	chr4
ENSG00000179914	chr1
ENSG00000253445	chr5
ENSG00000262921	chr17
ENSG00000259518	chr15
ENSG00000131379	chr3
ENSG00000260413	chr16
ENSG00000196248	chr11
ENSG00000205865	chr11
ENSG00000228030	chr7
ENSG00000269621	chr1
ENSG00000212520	chr10
ENSG00000255870	chr11
ENSG00000228083	chr9
ENSG00000126838	chr12
ENSG00000226683	chr13
ENSG00000205495	chr11
ENSG00000135569	chr6
ENSG00000269210	chr2
ENSG00000243574	chr7
ENSG00000171481	chr9
ENSG00000265182	chr18
ENSG00000101327	chr20
ENSG00000261448	chr16
ENSG00000255002	chr14
ENSG00000171199	chr4
ENSG00000224970	chr7
ENSG00000259675	chr15
ENSG00000254306	chr8
ENSG00000264265	chr18
ENSG00000266368	chr17
ENSG00000240666	chr3
ENSG00000253395	chr8
ENSG00000263171	chr17
ENSG00000204936	chr19
ENSG00000248337	chr5
ENSG00000215481	chr22
ENSG00000235408	chr20
ENSG00000155918	chr6
ENSG00000256615	chr12
ENSG00000218281	chr6
ENSG00000235261	chr3
ENSG00000230515	chr2
ENSG00000249830	chr5
ENSG00000203581	chr16
ENSG00000248166	chr19
ENSG00000176219	chr14
ENSG00000258320	chr12
ENSG00000267642	chr18
ENSG00000221996	chr11
ENSG00000261065	chr1
ENSG00000142182	chr21
ENSG00000236389	chr6
ENSG00000188069	chr11
ENSG00000273033	chr3
ENSG00000138755	chr4
ENSG00000261000	chr1
ENSG00000256577	chr12
ENSG00000243220	chr7
ENSG00000185303	chr10
ENSG00000181001	chr11
ENSG00000234409	chr22
ENSG00000257711	chr12
ENSG00000165507	chr10
ENSG00000207174	chr15
ENSG00000188050	chr7
ENSG00000160882	chr8
ENSG00000203804	chr1
ENSG00000260102	chr13
ENSG00000259176	chr15
ENSG00000164645	chr7
ENSG00000234707	chr7
ENSG00000135355	chr6
ENSG00000225058	chr3
ENSG00000253141	chr5
ENSG00000227685	chr17
ENSG00000163440	chr4
ENSG00000197953	chr3
ENSG00000158445	chr20
ENSG00000244620	chr14
ENSG00000157992	chr2
ENSG00000254361	chr8
ENSG00000172940	chr3
ENSG00000215808	chr1
ENSG00000110848	chr12
ENSG00000251206	chr5
ENSG00000174418	chr13
ENSG00000221844	chr9
ENSG00000267053	chr19
ENSG00000218226	chr6
ENSG00000229964	chr3
ENSG00000259429	chr15
ENSG00000176200	chr11
ENSG00000160883	chr5
ENSG00000129437	chr19
ENSG00000184795	chr11
ENSG00000211794	chr14
ENSG00000230739	chr1
ENSG00000228189	chr9
ENSG00000116721	chr1
ENSG00000141480	chr17
ENSG00000225364	chr5
ENSG00000186051	chr9
ENSG00000253965	chr5
ENSG00000207088	chr3
ENSG00000254568	chr11
ENSG00000265590	chr21
ENSG00000132406	chr4
ENSG00000199107	chr14
ENSG00000221932	chr11
ENSG00000249356	chr4
ENSG00000115598	chr2
ENSG00000213130	chr6
ENSG00000239492	chr10
ENSG00000256894	chr12
ENSG00000234263	chr6
ENSG00000261637	chr16
ENSG00000204941	chr19
ENSG00000243155	chr1
ENSG00000255146	chr11
ENSG00000259727	chr15
ENSG00000128285	chr22
ENSG00000251152	chr4
ENSG00000227431	chr20
ENSG00000233221	chr2
ENSG00000213697	chr11
ENSG00000241293	chr3
ENSG00000236467	chr10
ENSG00000197309	chr11
ENSG00000175699	chr14
ENSG00000170848	chr19
ENSG00000231740	chr1
ENSG00000257790	chr12
ENSG00000232190	chr16
ENSG00000151967	chr3
ENSG00000117834	chr1
ENSG00000005102	chr17
ENSG00000122375	chr10
ENSG00000213236	chr2
ENSG00000256229	chr19
ENSG00000250244	chr5
ENSG00000199077	chr11
ENSG00000171903	chr19
ENSG00000253802	chr8
ENSG00000222001	chr2
ENSG00000198390	chr21
ENSG00000155052	chr2
ENSG00000250447	chr5
ENSG00000239365	chr14
ENSG00000256390	chr16
ENSG00000235374	chr21
ENSG00000262521	chr16
ENSG00000232814	chr13
ENSG00000179626	chr12
ENSG00000237008	chr1
ENSG00000251780	chr1
ENSG00000214794	chr5
ENSG00000242479	chr3
ENSG00000261069	chr15
ENSG00000224877	chr17
ENSG00000273419	chr7
ENSG00000228754	chr10
ENSG00000105559	chr19
ENSG00000227337	chr3
ENSG00000178828	chr1
ENSG00000237568	chr1
ENSG00000215480	chr13
ENSG00000176681	chr17
ENSG00000213077	chr17
ENSG00000230035	chr1
ENSG00000261168	chr1
ENSG00000215478	chr22
ENSG00000155066	chr2
ENSG00000273087	chr14
ENSG00000254164	chr5
ENSG00000233951	chr7
ENSG00000125618	chr2
ENSG00000216775	chr6
ENSG00000253595	chr8
ENSG00000168634	chr20
ENSG00000206356	chr5
ENSG00000170858	chr19
ENSG00000221411	chr19
ENSG00000232930	chr7
ENSG00000241287	chr6
ENSG00000236372	chr1
ENSG00000255117	chr11
ENSG00000262580	chr17
ENSG00000257222	chr12
ENSG00000184274	chr21
ENSG00000186743	chr6
ENSG00000263609	chr17
ENSG00000236053	chr13
ENSG00000223419	chr7
ENSG00000108342	chr17
ENSG00000259348	chr15
ENSG00000267767	chr19
ENSG00000268818	chr22
ENSG00000253974	chr8
ENSG00000259666	chr15
ENSG00000243014	chr3
ENSG00000264885	chr17
ENSG00000169327	chr14
ENSG00000221858	chr7
ENSG00000158786	chr1
ENSG00000260173	chr15
ENSG00000227824	chr2
ENSG00000266676	chr10
ENSG00000270898	chr2
ENSG00000244738	chr3
ENSG00000254309	chr8
ENSG00000267075	chr17
ENSG00000177757	chr1
ENSG00000215158	chr5
ENSG00000261121	chr4
ENSG00000187003	chr9
ENSG00000118194	chr1
ENSG00000068079	chr17
ENSG00000226835	chr1
ENSG00000237510	chr2
ENSG00000260115	chr16
ENSG00000211896	chr14
ENSG00000260590	chr16
ENSG00000185559	chr14
ENSG00000224795	chr11
ENSG00000156575	chr11
ENSG00000167117	chr17
ENSG00000205837	chr2
ENSG00000229227	chr10
ENSG00000255273	chr8
ENSG00000256542	chr12
ENSG00000247311	chr5
ENSG00000197428	chr11
ENSG00000221900	chr7
ENSG00000228285	chr6
ENSG00000249605	chr5
ENSG00000253359	chr14
ENSG00000163202	chr1
ENSG00000250378	chr5
ENSG00000266433	chr17
ENSG00000250799	chr19
ENSG00000271093	chr22
ENSG00000237437	chr9
ENSG00000260465	chr16
ENSG00000258967	chr14
ENSG00000259942	chr10
ENSG00000187918	chr11
ENSG00000213970	chr12
ENSG00000170631	chr8
ENSG00000229900	chr20
ENSG00000223491	chr1
ENSG00000165935	chr12
ENSG00000253239	chr22
ENSG00000272070	chr5
ENSG00000234754	chr1
ENSG00000170820	chr2
ENSG00000161798	chr12
ENSG00000248731	chr8
ENSG00000250405	chr5
ENSG00000134716	chr1
ENSG00000273249	chr9
ENSG00000268179	chr1
ENSG00000183668	chr19
ENSG00000196611	chr11
ENSG00000235519	chr2
ENSG00000254744	chr15
ENSG00000250887	chr4
ENSG00000254066	chr5
ENSG00000208027	chr14
ENSG00000173714	chr17
ENSG00000243491	chr2
ENSG00000205441	chr21
ENSG00000207865	chr1
ENSG00000225062	chr2
ENSG00000237869	chr9
ENSG00000257482	chr7
ENSG00000214652	chr7
ENSG00000237589	chr19
ENSG00000255375	chr11
ENSG00000154227	chr15
ENSG00000163519	chr3
ENSG00000273221	chr1
ENSG00000123454	chr9
ENSG00000226075	chr7
ENSG00000244550	chr7
ENSG00000228784	chr2
ENSG00000132744	chr11
ENSG00000234638	chr2
ENSG00000180219	chr12
ENSG00000198502	chr6
ENSG00000256001	chr12
ENSG00000254654	chr11
ENSG00000259910	chr16
ENSG00000180708	chr1
ENSG00000245261	chr6
ENSG00000196301	chr6
ENSG00000232187	chr13
ENSG00000229492	chr22
ENSG00000160446	chr9
ENSG00000235055	chr1
ENSG00000234560	chr11
ENSG00000251688	chr4
ENSG00000205959	chr4
ENSG00000229703	chr1
ENSG00000256049	chr1
ENSG00000199990	chr5
ENSG00000270017	chr15
ENSG00000172023	chr2
ENSG00000162771	chr1
ENSG00000256612	chr19
ENSG00000257359	chr12
ENSG00000231373	chr9
ENSG00000231421	chr17
ENSG00000272575	chr11
ENSG00000199130	chr16
ENSG00000188674	chr2
ENSG00000174368	chr7
ENSG00000236438	chr3
ENSG00000259175	chr15
ENSG00000230219	chr4
ENSG00000092295	chr14
ENSG00000256286	chr12
ENSG00000221273	chr11
ENSG00000125831	chr20
ENSG00000165678	chr10
ENSG00000235387	chr9
ENSG00000263787	chr17
ENSG00000119440	chr9
ENSG00000269106	chr19
ENSG00000270361	chr1
ENSG00000167741	chr17
ENSG00000254630	chr11
ENSG00000245857	chr8
ENSG00000272514	chr6
ENSG00000249357	chr5
ENSG00000182873	chr1
ENSG00000233878	chr7
ENSG00000188785	chr19
ENSG00000143869	chr2
ENSG00000229671	chr11
ENSG00000227484	chr22
ENSG00000235434	chr1
ENSG00000127074	chr1
ENSG00000203859	chr1
ENSG00000197503	chr12
ENSG00000248492	chr8
ENSG00000236800	chr10
ENSG00000207634	chr19
ENSG00000170683	chr11
ENSG00000260121	chr16
ENSG00000118113	chr11
ENSG00000214719	chr17
ENSG00000100593	chr14
ENSG00000229413	chr7
ENSG00000228198	chr1
ENSG00000266466	chr17
ENSG00000200259	chr19
ENSG00000240033	chr3
ENSG00000155761	chr1
ENSG00000173862	chr7
ENSG00000235121	chr1
ENSG00000224376	chr2
ENSG00000213934	chr11
ENSG00000229349	chr6
ENSG00000258781	chr14
ENSG00000272812	chr8
ENSG00000169550	chr11
ENSG00000249201	chr5
ENSG00000261436	chr16
ENSG00000178363	chr10
ENSG00000260009	chr16
ENSG00000273362	chr22
ENSG00000199489	chr15
ENSG00000272690	chr3
ENSG00000182854	chr15
ENSG00000110429	chr11
ENSG00000271361	chr6
ENSG00000176046	chr16
ENSG00000115607	chr2
ENSG00000236140	chr1
ENSG00000177535	chr1
ENSG00000243716	chr16
ENSG00000234383	chr1
ENSG00000231747	chr2
ENSG00000238394	chr7
ENSG00000204572	chr11
ENSG00000168703	chr20
ENSG00000215483	chr13
ENSG00000260025	chr2
ENSG00000174325	chr2
ENSG00000176782	chr8
ENSG00000263264	chr19
ENSG00000154997	chr7
ENSG00000171595	chr17
ENSG00000205186	chr8
ENSG00000266233	chr3
ENSG00000176937	chr11
ENSG00000264813	chr17
ENSG00000237026	chr7
ENSG00000253311	chr5
ENSG00000225231	chr12
ENSG00000164309	chr5
ENSG00000124440	chr19
ENSG00000235269	chr14
ENSG00000172689	chr11
ENSG00000258975	chr14
ENSG00000227857	chr1
ENSG00000272141	chr1
ENSG00000259692	chr15
ENSG00000258848	chr15
ENSG00000272396	chr19
ENSG00000216135	chr3
ENSG00000181903	chr11
ENSG00000235822	chr13
ENSG00000207749	chr14
ENSG00000173432	chr11
ENSG00000251413	chr10
ENSG00000235403	chr2
ENSG00000222784	chr1
ENSG00000254486	chr11
ENSG00000261104	chr2
ENSG00000214866	chr2
ENSG00000258919	chr14
ENSG00000222036	chr14
ENSG00000140093	chr14
ENSG00000242507	chr20
ENSG00000125975	chr20
ENSG00000124256	chr20
ENSG00000268729	chr19
ENSG00000225243	chr1
ENSG00000250715	chr5
ENSG00000229086	chr21
ENSG00000178804	chr3
ENSG00000265678	chr17
ENSG00000204644	chr6
ENSG00000250584	chr5
ENSG00000258018	chr12
ENSG00000140067	chr14
ENSG00000267108	chr18
ENSG00000254592	chr11
ENSG00000242753	chr6
ENSG00000259058	chr14
ENSG00000249441	chr4
ENSG00000254911	chr11
ENSG00000179407	chr3
ENSG00000259346	chr15
ENSG00000229027	chr22
ENSG00000113328	chr5
ENSG00000264357	chr7
ENSG00000237094	chr1
ENSG00000214330	chr2
ENSG00000086102	chr9
ENSG00000227480	chr2
ENSG00000248469	chr5
ENSG00000228031	chr7
ENSG00000182909	chr19
ENSG00000229365	chr7
ENSG00000205449	chr5
ENSG00000266261	chr17
ENSG00000255498	chr11
ENSG00000111644	chr12
ENSG00000075886	chr2
ENSG00000236719	chr1
ENSG00000127241	chr3
ENSG00000204300	chr11
ENSG00000261655	chr8
ENSG00000102683	chr13
ENSG00000186795	chr10
ENSG00000171936	chr19
ENSG00000232487	chr13
ENSG00000230289	chr9
ENSG00000224403	chr3
ENSG00000257150	chr12
ENSG00000113140	chr5
ENSG00000174942	chr11
ENSG00000248332	chr11
ENSG00000226251	chr1
ENSG00000219932	chr10
ENSG00000262262	chr17
ENSG00000230580	chr2
ENSG00000237285	chr6
ENSG00000267283	chr19
ENSG00000237184	chr17
ENSG00000183828	chr14
ENSG00000250374	chr4
ENSG00000095464	chr10
ENSG00000188931	chr1
ENSG00000134827	chr11
ENSG00000213290	chr19
ENSG00000231242	chr9
ENSG00000198547	chr20
ENSG00000236883	chr21
ENSG00000225015	chr1
ENSG00000267919	chr2
ENSG00000204365	chr10
ENSG00000200779	chr2
ENSG00000171368	chr5
ENSG00000268317	chr16
ENSG00000235815	chr6
ENSG00000226218	chr2
ENSG00000215405	chr15
ENSG00000108255	chr17
ENSG00000272167	chr1
ENSG00000185792	chr19
ENSG00000254741	chr8
ENSG00000207460	chr15
ENSG00000267201	chr19
ENSG00000230845	chr6
ENSG00000174937	chr11
ENSG00000255808	chr11
ENSG00000266973	chr19
ENSG00000250453	chr5
ENSG00000243715	chr3
ENSG00000263982	chr18
ENSG00000259104	chr14
ENSG00000234770	chr8
ENSG00000213493	chr4
ENSG00000258771	chr15
ENSG00000212380	chr15
ENSG00000240563	chr1
ENSG00000204566	chr10
ENSG00000094796	chr17
ENSG00000235084	chr1
ENSG00000127472	chr1
ENSG00000168515	chr11
ENSG00000233922	chr21
ENSG00000215863	chr1
ENSG00000202569	chr10
ENSG00000229345	chr9
ENSG00000258842	chr14
ENSG00000167118	chr9
ENSG00000177236	chr11
ENSG00000160973	chr8
ENSG00000231305	chr3
ENSG00000189181	chr1
ENSG00000258977	chr14
ENSG00000180229	chr15
ENSG00000235812	chr14
ENSG00000205327	chr12
ENSG00000162642	chr1
ENSG00000204711	chr9
ENSG00000124092	chr20
ENSG00000224361	chr2
ENSG00000196119	chr11
ENSG00000222190	chr16
ENSG00000217950	chr2
ENSG00000258092	chr12
ENSG00000212916	chr1
ENSG00000231707	chr4
ENSG00000243449	chr4
ENSG00000132698	chr1
ENSG00000254578	chr8
ENSG00000196620	chr4
ENSG00000132693	chr1
ENSG00000197251	chr6
ENSG00000152705	chr5
ENSG00000112273	chr6
ENSG00000259495	chr15
ENSG00000196240	chr1
ENSG00000206633	chr2
ENSG00000124900	chr11
ENSG00000207604	chr6
ENSG00000272825	chr21
ENSG00000204003	chr9
ENSG00000170454	chr12
ENSG00000171872	chr1
ENSG00000171989	chr15
ENSG00000156282	chr21
ENSG00000172362	chr11
ENSG00000267291	chr19
ENSG00000258935	chr14
ENSG00000250752	chr8
ENSG00000267123	chr17
ENSG00000254632	chr11
ENSG00000255245	chr11
ENSG00000272381	chr10
ENSG00000216179	chr14
ENSG00000185294	chr17
ENSG00000186970	chr21
ENSG00000176895	chr11
ENSG00000211597	chr2
ENSG00000261233	chr16
ENSG00000175946	chr8
ENSG00000255353	chr11
ENSG00000265460	chr17
ENSG00000224992	chr9
ENSG00000213424	chr17
ENSG00000271781	chr5
ENSG00000186777	chr4
ENSG00000248596	chr5
ENSG00000245205	chr12
ENSG00000170835	chr9
ENSG00000105507	chr19
ENSG00000229835	chr9
ENSG00000258169	chr12
ENSG00000184345	chr3
ENSG00000258689	chr14
ENSG00000268049	chr19
ENSG00000131738	chr17
ENSG00000253743	chr5
ENSG00000213414	chr5
ENSG00000253392	chr19
ENSG00000035720	chr4
ENSG00000249109	chr5
ENSG00000253314	chr8
ENSG00000254192	chr5
ENSG00000255540	chr11
ENSG00000224172	chr7
ENSG00000231951	chr7
ENSG00000228989	chr2
ENSG00000207767	chr19
ENSG00000177201	chr1
ENSG00000261396	chr16
ENSG00000254872	chr11
ENSG00000246640	chr17
ENSG00000161583	chr17
ENSG00000172367	chr11
ENSG00000167676	chr19
ENSG00000224729	chr7
ENSG00000248599	chr8
ENSG00000248449	chr5
ENSG00000214319	chr21
ENSG00000171495	chr5
ENSG00000261286	chr16
ENSG00000108849	chr17
ENSG00000225775	chr6
ENSG00000241767	chr3
ENSG00000186842	chr21
ENSG00000236106	chr2
ENSG00000270562	chr3
ENSG00000188257	chr1
ENSG00000260030	chr12
ENSG00000226554	chr13
ENSG00000163424	chr3
ENSG00000224761	chr10
ENSG00000141194	chr17
ENSG00000203685	chr1
ENSG00000226883	chr1
ENSG00000177143	chr18
ENSG00000268470	chr17
ENSG00000224924	chr21
ENSG00000257501	chr12
ENSG00000234869	chr22
ENSG00000213921	chr19
ENSG00000228319	chr13
ENSG00000224257	chr2
ENSG00000139648	chr12
ENSG00000163170	chr2
ENSG00000257017	chr16
ENSG00000255390	chr11
ENSG00000260234	chr3
ENSG00000133742	chr8
ENSG00000248302	chr4
ENSG00000256137	chr12
ENSG00000224977	chr1
ENSG00000141161	chr17
ENSG00000186572	chr8
ENSG00000258183	chr12
ENSG00000260337	chr15
ENSG00000261976	chr17
ENSG00000162365	chr1
ENSG00000204175	chr10
ENSG00000260013	chr16
ENSG00000197532	chr1
ENSG00000236678	chr13
ENSG00000258355	chr12
ENSG00000239617	chr12
ENSG00000259524	chr15
ENSG00000196533	chr1
ENSG00000171223	chr19
ENSG00000226587	chr7
ENSG00000230000	chr7
ENSG00000259114	chr14
ENSG00000214660	chr7
ENSG00000223916	chr3
ENSG00000226925	chr2
ENSG00000163209	chr1
ENSG00000100197	chr22
ENSG00000227945	chr6
ENSG00000207776	chr1
ENSG00000204446	chr9
ENSG00000227080	chr7
ENSG00000254341	chr8
ENSG00000253606	chr8
ENSG00000265479	chr7
ENSG00000255262	chr11
ENSG00000167851	chr17
ENSG00000268307	chr19
ENSG00000162882	chr2
ENSG00000164007	chr1
ENSG00000246115	chr12
ENSG00000142677	chr1
ENSG00000263375	chr17
ENSG00000265992	chr3
ENSG00000213177	chr6
ENSG00000143412	chr1
ENSG00000226995	chr20
ENSG00000187012	chr22
ENSG00000135436	chr12
ENSG00000242731	chr7
ENSG00000197403	chr1
ENSG00000258792	chr14
ENSG00000164175	chr5
ENSG00000163141	chr1
ENSG00000257564	chr12
ENSG00000164049	chr3
ENSG00000256916	chr11
ENSG00000197790	chr11
ENSG00000254338	chr8
ENSG00000248646	chr4
ENSG00000228960	chr7
ENSG00000254142	chr8
ENSG00000182631	chr5
ENSG00000187066	chr11
ENSG00000235455	chr3
ENSG00000224646	chr2
ENSG00000215146	chr10
ENSG00000117592	chr1
ENSG00000135698	chr16
ENSG00000100191	chr22
ENSG00000175003	chr6
ENSG00000250602	chr5
ENSG00000226363	chr2
ENSG00000231588	chr10
ENSG00000267145	chr19
ENSG00000213927	chr9
ENSG00000261452	chr2
ENSG00000172538	chr10
ENSG00000253483	chr8
ENSG00000106080	chr7
ENSG00000221888	chr1
ENSG00000249695	chr12
ENSG00000215186	chr15
ENSG00000271377	chr8
ENSG00000117983	chr11
ENSG00000270601	chr1
ENSG00000169474	chr1
ENSG00000256686	chr12
ENSG00000207825	chr19
ENSG00000224093	chr1
ENSG00000133863	chr8
ENSG00000256721	chr12
ENSG00000253968	chr5
ENSG00000160124	chr3
ENSG00000170613	chr5
ENSG00000231557	chr2
ENSG00000256462	chr10
ENSG00000224164	chr6
ENSG00000223443	chr8
ENSG00000249231	chr16
ENSG00000171053	chr11
ENSG00000162949	chr2
ENSG00000267469	chr19
ENSG00000109471	chr4
ENSG00000271774	chr20
ENSG00000223700	chr2
ENSG00000240204	chr7
ENSG00000232736	chr7
ENSG00000220666	chr6
ENSG00000132514	chr17
ENSG00000188293	chr19
ENSG00000205628	chr7
ENSG00000235546	chr17
ENSG00000254833	chr11
ENSG00000236206	chr1
ENSG00000131910	chr1
ENSG00000231698	chr11
ENSG00000105609	chr19
ENSG00000225663	chr17
ENSG00000228216	chr9
ENSG00000247679	chr5
ENSG00000142233	chr19
ENSG00000155886	chr9
ENSG00000175664	chr13
ENSG00000133519	chr22
ENSG00000236440	chr2
ENSG00000234241	chr20
ENSG00000240777	chr3
ENSG00000272304	chr4
ENSG00000233858	chr8
ENSG00000213358	chr3
ENSG00000196374	chr6
ENSG00000254923	chr8
ENSG00000101407	chr20
ENSG00000225373	chr19
ENSG00000228651	chr10
ENSG00000106631	chr7
ENSG00000071677	chr2
ENSG00000153989	chr6
ENSG00000172150	chr17
ENSG00000273333	chr6
ENSG00000272192	chr8
ENSG00000262155	chr16
ENSG00000230292	chr3
ENSG00000229528	chr1
ENSG00000260093	chr8
ENSG00000221036	chr14
ENSG00000235091	chr22
ENSG00000225329	chr7
ENSG00000228487	chr9
ENSG00000249131	chr5
ENSG00000222031	chr2
ENSG00000232197	chr6
ENSG00000235159	chr22
ENSG00000249237	chr1
ENSG00000119913	chr10
ENSG00000139053	chr12
ENSG00000170089	chr5
ENSG00000197176	chr14
ENSG00000203601	chr1
ENSG00000254454	chr11
ENSG00000198471	chr3
ENSG00000207191	chr15
ENSG00000179583	chr16
ENSG00000223784	chr10
ENSG00000128313	chr22
ENSG00000233645	chr1
ENSG00000118094	chr11
ENSG00000261257	chr11
ENSG00000212232	chr20
ENSG00000205678	chr4
ENSG00000270988	chr8
ENSG00000219159	chr2
ENSG00000204252	chr6
ENSG00000135968	chr2
ENSG00000196668	chr12
ENSG00000185808	chr21
ENSG00000188523	chr9
ENSG00000132694	chr1
ENSG00000108702	chr17
ENSG00000090382	chr12
ENSG00000172289	chr11
ENSG00000168614	chr1
ENSG00000167363	chr17
ENSG00000265101	chr18
ENSG00000128276	chr22
ENSG00000235493	chr3
ENSG00000179456	chr1
ENSG00000255486	chr11
ENSG00000173285	chr1
ENSG00000267069	chr18
ENSG00000253893	chr8
ENSG00000235726	chr2
ENSG00000267649	chr19
ENSG00000140678	chr16
ENSG00000089012	chr20
ENSG00000256064	chr12
ENSG00000259450	chr15
ENSG00000260603	chr16
ENSG00000270385	chr16
ENSG00000235535	chr6
ENSG00000225323	chr16
ENSG00000205693	chr12
ENSG00000234711	chr1
ENSG00000207695	chr15
ENSG00000159166	chr1
ENSG00000235942	chr1
ENSG00000158428	chr2
ENSG00000176566	chr8
ENSG00000177233	chr1
ENSG00000137392	chr6
ENSG00000236498	chr2
ENSG00000255885	chr12
ENSG00000228021	chr10
ENSG00000166152	chr16
ENSG00000189169	chr21
ENSG00000233478	chr1
ENSG00000228538	chr2
ENSG00000225937	chr9
ENSG00000163221	chr1
ENSG00000245954	chr4
ENSG00000204949	chr8
ENSG00000243480	chr1
ENSG00000249534	chr4
ENSG00000257219	chr12
ENSG00000204671	chr12
ENSG00000225293	chr22
ENSG00000227487	chr11
ENSG00000253726	chr8
ENSG00000242104	chr3
ENSG00000205565	chr5
ENSG00000132623	chr20
ENSG00000261247	chr15
ENSG00000213417	chr17
ENSG00000221290	chr1
ENSG00000148300	chr9
ENSG00000225233	chr1
ENSG00000175294	chr11
ENSG00000226057	chr13
ENSG00000221244	chr5
ENSG00000268424	chr5
ENSG00000207949	chr1
ENSG00000107618	chr10
ENSG00000225365	chr7
ENSG00000248893	chr15
ENSG00000226482	chr3
ENSG00000211746	chr7
ENSG00000255855	chr11
ENSG00000249697	chr5
ENSG00000244119	chr3
ENSG00000267387	chr19
ENSG00000178342	chr18
ENSG00000198750	chr7
ENSG00000271699	chr16
ENSG00000232058	chr17
ENSG00000186049	chr12
ENSG00000262135	chr17
ENSG00000132329	chr2
ENSG00000167791	chr11
ENSG00000013573	chr12
ENSG00000225913	chr10
ENSG00000179277	chr17
ENSG00000095981	chr6
ENSG00000159961	chr17
ENSG00000248426	chr5
ENSG00000226425	chr10
ENSG00000254299	chr5
ENSG00000242628	chr2
ENSG00000262652	chr17
ENSG00000152931	chr5
ENSG00000256980	chr6
ENSG00000260132	chr16
ENSG00000077463	chr19
ENSG00000253649	chr8
ENSG00000221116	chr20
ENSG00000182366	chr8
ENSG00000197258	chr7
ENSG00000228355	chr21
ENSG00000251270	chr3
ENSG00000172073	chr2
ENSG00000243187	chr3
ENSG00000231976	chr10
ENSG00000206149	chr15
ENSG00000254440	chr6
ENSG00000258654	chr15
ENSG00000229642	chr3
ENSG00000140030	chr14
ENSG00000198601	chr1
ENSG00000236761	chr6
ENSG00000131401	chr19
ENSG00000212544	chr1
ENSG00000175398	chr12
ENSG00000099812	chr19
ENSG00000249346	chr6
ENSG00000135409	chr12
ENSG00000233014	chr17
ENSG00000253979	chr5
ENSG00000253163	chr5
ENSG00000187173	chr1
ENSG00000168447	chr16
ENSG00000204486	chr1
ENSG00000225330	chr21
ENSG00000139714	chr12
ENSG00000230250	chr1
ENSG00000227288	chr1
ENSG00000207649	chr16
ENSG00000119699	chr14
ENSG00000236304	chr11
ENSG00000187621	chr14
ENSG00000130957	chr9
ENSG00000227868	chr1
ENSG00000249631	chr4
ENSG00000244383	chr3
ENSG00000257883	chr12
ENSG00000256237	chr12
ENSG00000236817	chr1
ENSG00000270971	chr8
ENSG00000207751	chr22
ENSG00000175728	chr11
ENSG00000179219	chr16
ENSG00000237361	chr13
ENSG00000176435	chr14
ENSG00000184162	chr19
ENSG00000221025	chr17
ENSG00000223774	chr1
ENSG00000205352	chr12
ENSG00000198570	chr1
ENSG00000224702	chr1
ENSG00000181562	chr14
ENSG00000233175	chr17
ENSG00000240093	chr7
ENSG00000198657	chr11
ENSG00000253236	chr5
ENSG00000122133	chr9
ENSG00000230898	chr1
ENSG00000263070	chr15
ENSG00000232759	chr7
ENSG00000213205	chr7
ENSG00000180210	chr11
ENSG00000187288	chr3
ENSG00000212952	chr9
ENSG00000237357	chr9
ENSG00000235862	chr1
ENSG00000224661	chr2
ENSG00000203999	chr20
ENSG00000254148	chr17
ENSG00000163331	chr2
ENSG00000234177	chr2
ENSG00000228361	chr6
ENSG00000259932	chr15
ENSG00000221366	chr22
ENSG00000144671	chr3
ENSG00000106948	chr9
ENSG00000216819	chr6
ENSG00000153060	chr16
ENSG00000214946	chr17
ENSG00000236452	chr3
ENSG00000165383	chr10
ENSG00000264981	chr17
ENSG00000172320	chr11
ENSG00000260549	chr16
ENSG00000110244	chr11
ENSG00000231322	chr7
ENSG00000253108	chr8
ENSG00000211590	chr21
ENSG00000125965	chr20
ENSG00000272205	chr1
ENSG00000168887	chr2
ENSG00000242640	chr4
ENSG00000236340	chr7
ENSG00000223638	chr19
ENSG00000272291	chr14
ENSG00000231187	chr10
ENSG00000256560	chr12
ENSG00000177275	chr1
ENSG00000225535	chr7
ENSG00000143845	chr1
ENSG00000166391	chr11
ENSG00000188171	chr19
ENSG00000254641	chr11
ENSG00000167384	chr19
ENSG00000227545	chr7
ENSG00000256948	chr12
ENSG00000203801	chr6
ENSG00000248817	chr4
ENSG00000120314	chr5
ENSG00000197046	chr18
ENSG00000258072	chr12
ENSG00000221961	chr2
ENSG00000248590	chr4
ENSG00000135175	chr7
ENSG00000214190	chr9
ENSG00000233728	chr1
ENSG00000251442	chr4
ENSG00000177174	chr1
ENSG00000248588	chr5
ENSG00000269855	chr19
ENSG00000207625	chr3
ENSG00000112379	chr6
ENSG00000246084	chr14
ENSG00000243543	chr20
ENSG00000223823	chr1
ENSG00000129151	chr11
ENSG00000197938	chr3
ENSG00000251306	chr5
ENSG00000188013	chr17
ENSG00000251564	chr7
ENSG00000113578	chr5
ENSG00000259696	chr15
ENSG00000133321	chr11
ENSG00000250522	chr4
ENSG00000250486	chr4
ENSG00000237377	chr17
ENSG00000207703	chr15
ENSG00000173662	chr1
ENSG00000272366	chr10
ENSG00000227728	chr1
ENSG00000242290	chr3
ENSG00000254737	chr11
ENSG00000144214	chr2
ENSG00000174307	chr1
ENSG00000185594	chr15
ENSG00000125900	chr20
ENSG00000241627	chr3
ENSG00000188877	chr8
ENSG00000036565	chr8
ENSG00000251123	chr4
ENSG00000255254	chr11
ENSG00000235268	chr11
ENSG00000233509	chr3
ENSG00000170373	chr20
ENSG00000159899	chr9
ENSG00000232987	chr11
ENSG00000204421	chr6
ENSG00000232722	chr8
ENSG00000181371	chr11
ENSG00000232223	chr1
ENSG00000231272	chr1
ENSG00000269948	chr10
ENSG00000075275	chr22
ENSG00000165271	chr9
ENSG00000239899	chr2
ENSG00000170091	chr5
ENSG00000183439	chr4
ENSG00000258725	chr15
ENSG00000188760	chr2
ENSG00000242267	chr1
ENSG00000266909	chr18
ENSG00000166527	chr12
ENSG00000205266	chr17
ENSG00000240279	chr17
ENSG00000255021	chr3
ENSG00000075429	chr17
ENSG00000160307	chr21
ENSG00000233896	chr20
ENSG00000259362	chr15
ENSG00000113520	chr5
ENSG00000196226	chr6
ENSG00000225473	chr3
ENSG00000254160	chr8
ENSG00000249661	chr4
ENSG00000196600	chr11
ENSG00000258442	chr12
ENSG00000262115	chr17
ENSG00000267019	chr19
ENSG00000172769	chr11
ENSG00000235958	chr20
ENSG00000243137	chr19
ENSG00000175485	chr11
ENSG00000013364	chr16
ENSG00000259690	chr15
ENSG00000196844	chr11
ENSG00000261534	chr9
ENSG00000204352	chr9
ENSG00000185105	chr17
ENSG00000206422	chr18
ENSG00000120471	chr11
ENSG00000213373	chr17
ENSG00000270960	chr4
ENSG00000221365	chr12
ENSG00000138002	chr2
ENSG00000253397	chr8
ENSG00000255472	chr14
ENSG00000206150	chr14
ENSG00000235574	chr7
ENSG00000179766	chr9
ENSG00000233608	chr2
ENSG00000187616	chr9
ENSG00000189430	chr19
ENSG00000226472	chr12
ENSG00000166961	chr11
ENSG00000139684	chr13
ENSG00000205929	chr21
ENSG00000264785	chr17
ENSG00000256220	chr11
ENSG00000118496	chr6
ENSG00000272642	chr11
ENSG00000151466	chr4
ENSG00000161643	chr19
ENSG00000242324	chr20
ENSG00000240935	chr2
ENSG00000238747	chr6
ENSG00000235151	chr2
ENSG00000207713	chr12
ENSG00000159588	chr1
ENSG00000186193	chr9
ENSG00000229414	chr11
ENSG00000146005	chr5
ENSG00000232993	chr1
ENSG00000247095	chr11
ENSG00000160471	chr19
ENSG00000256195	chr11
ENSG00000159640	chr17
ENSG00000258676	chr15
ENSG00000237119	chr20
ENSG00000221136	chr4
ENSG00000229205	chr10
ENSG00000259407	chr15
ENSG00000225630	chr1
ENSG00000157119	chr3
ENSG00000182591	chr21
ENSG00000224932	chr4
ENSG00000152939	chr5
ENSG00000272525	chr5
ENSG00000233842	chr2
ENSG00000214602	chr2
ENSG00000232760	chr2
ENSG00000166104	chr15
ENSG00000159516	chr1
ENSG00000234880	chr21
ENSG00000216306	chr12
ENSG00000125780	chr20
ENSG00000214248	chr19
ENSG00000116741	chr1
ENSG00000126233	chr8
ENSG00000237248	chr12
ENSG00000226398	chr2
ENSG00000247993	chr5
ENSG00000272149	chr3
ENSG00000145888	chr5
ENSG00000149443	chr20
ENSG00000229001	chr10
ENSG00000236658	chr9
ENSG00000167110	chr9
ENSG00000224057	chr7
ENSG00000176798	chr11
ENSG00000234627	chr13
ENSG00000260880	chr16
ENSG00000164976	chr9
ENSG00000265474	chr17
ENSG00000171773	chr19
ENSG00000198719	chr6
ENSG00000235026	chr2
ENSG00000141437	chr18
ENSG00000258433	chr15
ENSG00000253896	chr8
ENSG00000268568	chr19
ENSG00000272573	chr3
ENSG00000142623	chr1
ENSG00000019991	chr7
ENSG00000205560	chr22
ENSG00000221938	chr7
ENSG00000173578	chr3
ENSG00000147613	chr8
ENSG00000266885	chr17
ENSG00000168582	chr2
ENSG00000254739	chr11
ENSG00000259708	chr15
ENSG00000182851	chr8
ENSG00000227689	chr17
ENSG00000183888	chr1
ENSG00000199782	chr15
ENSG00000175873	chr7
ENSG00000267324	chr18
ENSG00000176903	chr14
ENSG00000258590	chr15
ENSG00000255470	chr11
ENSG00000205147	chr19
ENSG00000178279	chr16
ENSG00000023171	chr11
ENSG00000115290	chr2
ENSG00000244926	chr11
ENSG00000223612	chr1
ENSG00000161249	chr19
ENSG00000233607	chr7
ENSG00000163071	chr4
ENSG00000230549	chr8
ENSG00000259244	chr15
ENSG00000204655	chr6
ENSG00000132801	chr20
ENSG00000240432	chr21
ENSG00000227920	chr6
ENSG00000227896	chr10
ENSG00000138684	chr4
ENSG00000160339	chr9
ENSG00000251209	chr15
ENSG00000234722	chr7
ENSG00000228586	chr2
ENSG00000243150	chr3
ENSG00000241549	chr6
ENSG00000151655	chr10
ENSG00000231258	chr17
ENSG00000203585	chr12
ENSG00000137747	chr11
ENSG00000230948	chr8
ENSG00000258791	chr14
ENSG00000109927	chr11
ENSG00000185974	chr13
ENSG00000213859	chr17
ENSG00000230269	chr6
ENSG00000250173	chr5
ENSG00000145309	chr4
ENSG00000140506	chr15
ENSG00000259494	chr15
ENSG00000264630	chr17
ENSG00000226258	chr3
ENSG00000232065	chr3
ENSG00000255689	chr11
ENSG00000235683	chr8
ENSG00000171421	chr5
ENSG00000217261	chr22
ENSG00000124490	chr6
ENSG00000272672	chr1
ENSG00000168487	chr8
ENSG00000258902	chr14
ENSG00000183798	chr20
ENSG00000259833	chr16
ENSG00000178462	chr10
ENSG00000170477	chr12
ENSG00000264324	chr2
ENSG00000163794	chr2
ENSG00000237289	chr15
ENSG00000272043	chr8
ENSG00000172653	chr17
ENSG00000157017	chr3
ENSG00000254391	chr5
ENSG00000260066	chr5
ENSG00000106633	chr7
ENSG00000255318	chr11
ENSG00000234577	chr6
ENSG00000100196	chr22
ENSG00000169325	chr7
ENSG00000137648	chr11
ENSG00000197372	chr19
ENSG00000240505	chr17
ENSG00000213416	chr17
ENSG00000121064	chr17
ENSG00000264127	chr18
ENSG00000199088	chr14
ENSG00000251875	chr1
ENSG00000167258	chr17
ENSG00000135413	chr12
ENSG00000181092	chr3
ENSG00000237027	chr6
ENSG00000213438	chr10
ENSG00000167798	chr19
ENSG00000235203	chr17
ENSG00000226122	chr7
ENSG00000242611	chr7
ENSG00000253288	chr8
ENSG00000151005	chr4
ENSG00000214841	chr7
ENSG00000263433	chr17
ENSG00000240086	chr3
ENSG00000154319	chr8
ENSG00000260892	chr15
ENSG00000225361	chr9
ENSG00000264066	chr17
ENSG00000104899	chr19
ENSG00000131142	chr19
ENSG00000100302	chr22
ENSG00000259813	chr16
ENSG00000126545	chr4
ENSG00000268854	chr19
ENSG00000128519	chr7
ENSG00000237914	chr20
ENSG00000241324	chr7
ENSG00000205863	chr13
ENSG00000071203	chr11
ENSG00000145794	chr5
ENSG00000253509	chr8
ENSG00000256783	chr12
ENSG00000239715	chr7
ENSG00000264811	chr17
ENSG00000145147	chr4
ENSG00000217862	chr6
ENSG00000137558	chr8
ENSG00000206069	chr22
ENSG00000232211	chr9
ENSG00000241690	chr20
ENSG00000197858	chr8
ENSG00000177947	chr11
ENSG00000179082	chr9
ENSG00000039537	chr5
ENSG00000228797	chr13
ENSG00000081800	chr7
ENSG00000185823	chr15
ENSG00000189166	chr7
ENSG00000204706	chr9
ENSG00000248408	chr4
ENSG00000253932	chr8
ENSG00000159625	chr16
ENSG00000228613	chr2
ENSG00000234206	chr6
ENSG00000229913	chr1
ENSG00000255415	chr11
ENSG00000259883	chr15
ENSG00000170953	chr11
ENSG00000255272	chr11
ENSG00000212710	chr18
ENSG00000211530	chr6
ENSG00000254938	chr11
ENSG00000251216	chr4
ENSG00000121377	chr12
ENSG00000267055	chr7
ENSG00000270764	chr7
ENSG00000260776	chr15
ENSG00000257048	chr12
ENSG00000136834	chr9
ENSG00000255252	chr11
ENSG00000187867	chr19
ENSG00000196409	chr9
ENSG00000256810	chr12
ENSG00000265799	chr17
ENSG00000228105	chr1
ENSG00000185940	chr11
ENSG00000214266	chr13
ENSG00000217646	chr6
ENSG00000187766	chr21
ENSG00000151365	chr11
ENSG00000121900	chr1
ENSG00000203616	chr21
[truncated: 27,654 more rows]

## Sheet: low n-3_vs_high n-3 PUFAs(B)
Supplementary Table 6. B
Significantly differentially methylated genes at promoter region in Low n-3 PUFAs vs High n-3 PUFAs
id	Chromosome	Gene list	mean.mean.diff	pvalue
ENSG00000214851	chr12	LINC00612	-0.0566398	0.00414895
ENSG00000115239	chr2	GPR75-ASB3	-0.0223498	0.00545309
ENSG00000119737	chr2	GPR75	-0.0223498	0.00545309
ENSG00000245105	chr12	A2M-AS1	-0.0526221	0.00591358
ENSG00000266242	chr18	GRAMD4P7	0.0234432	0.00603008
ENSG00000223245	chr2	RNU4-63P	0.0219811	0.00614338
ENSG00000133028	chr17	SCO1	0.0308564	0.00862028
ENSG00000231870	chr17	KRT17P3	0.0259779	0.00919209
ENSG00000151967	chr3	SCHIP1	-0.0387711	0.0098929
ENSG00000197888	chr4	UGT2B17	0.0729059	0.0103812
ENSG00000250182	chr5	EEF1A1P13	0.0207847	0.0106186
ENSG00000234030	chr21	TMEM97P1	0.0184961	0.0108097
ENSG00000176253	chr14	OR4K13	0.0106037	0.0125939
ENSG00000101343	chr20	CRNKL1	-0.031029	0.016918
ENSG00000213061	chr10	PFN1P11	0.017978	0.017126
ENSG00000236937	chr10	PTGES3P4	0.017978	0.017126
ENSG00000144118	chr2	RALB	0.00589894	0.0196422
ENSG00000164122	chr4	ASB5	0.00849232	0.0203347
ENSG00000164825	chr8	DEFB1	-0.0196752	0.0227725
ENSG00000189152	chr17	GRAPL	0.00794438	0.0228449
ENSG00000250420	chr5	AACSP1	0.028545	0.0228634
ENSG00000185565	chr3	LSAMP	0.0105779	0.0231006
ENSG00000263706	chr10	RN7SL450P	-0.034695	0.0238779
ENSG00000201142	chr1	RNVU1-8	-0.0793312	0.0239272
ENSG00000213091	chr6	PHBP1	0.0215917	0.0264581
ENSG00000137731	chr11	FXYD2	0.0196161	0.0274036
ENSG00000182053	chr11	TRIM49B	0.00885518	0.0276491
ENSG00000180229	chr15	HERC2P3	-0.035342	0.027889
ENSG00000151079	chr12	KCNA6	0.0258251	0.0283647
ENSG00000266564	chr1	MIR4418	0.0247869	0.028755
ENSG00000270930	chr2	GRAMD4P8	0.012115	0.0288397
ENSG00000174667	chr19	OR7D4	0.015347	0.0289997
ENSG00000108465	chr17	CDK5RAP3	0.0147153	0.0294422
ENSG00000211836	chr14	TRAJ54	-0.0223015	0.0312421
ENSG00000211837	chr14	TRAJ53	-0.0223015	0.0312421
ENSG00000196071	chr1	OR2L13	0.0485651	0.0318707
ENSG00000137709	chr11	POU2F3	0.0163685	0.0332898
ENSG00000204805	chr9	FAM27E4	0.0263393	0.0348783
ENSG00000212387	chr4	RNU6-1055P	-0.0298526	0.0351736
ENSG00000181984	chr15	GOLGA8CP	0.0187632	0.0356316
ENSG00000134014	chr8	ELP3	0.0240829	0.0377385
ENSG00000172164	chr8	SNTB1	0.00954137	0.0386252
ENSG00000251165	chr4	F11-AS1	-0.0248786	0.0388953
ENSG00000236734	chr7	GRIFIN	0.013236	0.0396262
ENSG00000130950	chr9	NUTM2F	0.0269052	0.0409737
ENSG00000158747	chr1	NBL1	0.0135588	0.0429335
ENSG00000236460	chr7	SNX2P2	0.0106993	0.0433518
ENSG00000184795	chr11	UNC93B5	0.0109853	0.0434484
ENSG00000224594	chr8	RPL29P19	0.00778002	0.0444619
ENSG00000255298	chr11	OR8G5	0.0127044	0.0447271
ENSG00000251234	chr8	PSMA2P2	0.00961554	0.045158
ENSG00000241266	chr15	RN7SL82P	-0.0154247	0.0457634
ENSG00000260305	chr15	NTRK3-AS1	0.00904612	0.047162
ENSG00000201085	chr4	RNU6-173P	0.0214953	0.0474146
ENSG00000226683	chr13	PWWP2AP1	-0.0247459	0.0474851
ENSG00000168874	chr2	ATOH8	0.00962204	0.0477443
ENSG00000231459	chr9	LINC00032	0.0104048	0.0477922
ENSG00000231009	chr10	CUBNP1	0.00965892	0.0481434
ENSG00000167360	chr11	OR51Q1	0.0158926	0.0483564
ENSG00000186113	chr11	OR5D14	0.0234439	0.0492959
ENSG00000268869	chr1	ESPNP	-0.00647174	0.0495243

## Sheet: low n-3_vs_high n-3 PUFAs(C)
Supplementary Table 6. C
Significantly differentially methylated genes at CpG islands in Low n-3 PUFAs vs High n-3 PUFAs
id	Chromosome	Start	End	Gene list	mean.mean.diff	pvalue
5488	chr4	2401508	2401759	ZFYVE28	0.0315155	0.000142227
19901	chr16	88268114	88268367	AC138512.1	0.0609663	0.00180747
10012	chr7	127910861	127911287	SND1	0.0599191	0.00193706
2994	chr2	74357575	74358014	AC006030.1	-0.074065	0.00278368
2844	chr2	54086777	54087266	ACYP2	-0.0248324	0.00297722
1563	chr1	146549851	146550075	HYDIN2	-0.151285	0.00394955
517	chr1	17018684	17020959	SDHB	-0.0544081	0.00447074
22725	chr19	3937324	3937967	NMRK2	0.0133594	0.00489806
10013	chr7	127911720	127912194	SND1	0.0309044	0.00717301
19244	chr16	29153242	29153478	AC009093.8	0.0175546	0.00917192
24172	chr19	47139338	47139547	SAE1	0.0121799	0.00998362
19269	chr16	29912897	29913203	ASPHD1	0.0221795	0.0101687
20949	chr17	44847140	44847463	HIGD1B	0.0344819	0.0110005
23785	chr19	37794271	37794574	ZNF573	0.0498474	0.0116194
1566	chr1	146552329	146552577	HYDIN2	-0.0451589	0.0127208
5701	chr4	25863761	25864845	SMIM20	0.0032365	0.0129056
12972	chr10	45470023	45470291	MARCH8	-0.0274325	0.0132631
15699	chr12	57569724	57569941	KIF5A	0.0194987	0.0152173
2454	chr1	248100326	248100726	OR2L13	0.0691982	0.016022
21813	chr18	13262330	13263271	LDLRAD4	0.00964	0.0165646
13816	chr11	289772	290010	PGGHG	0.089357	0.0166081
16324	chr12	132910477	132910802	CHFR	0.0128913	0.0173013
5007	chr3	142666199	142666544	PLS1	-0.0322195	0.0174384
24097	chr19	45849853	45850054	SYMPK	0.0278457	0.0179276
2538	chr2	3833816	3834318	DCDC2C	0.0113122	0.0181253
2475	chr2	495194	495834	AC093326.2	0.0205098	0.0184737
498	chr1	16532918	16534580	LINC01783	0.0137811	0.0184823
15237	chr12	4918274	4919657	AC005906.2	0.0213169	0.0187377
1599	chr1	147993811	147994130	PDZK1P1	-0.0214258	0.0192427
19924	chr16	88590205	88590410	ZC3H18	0.0276564	0.0193091
9292	chr7	27153188	27153647	HOXA-AS3	-0.0211657	0.0199364
5602	chr4	7511869	7512428	SORCS2	0.0192497	0.0200218
23119	chr19	11517060	11517284	ECSIT	-0.0290867	0.0209788
21386	chr17	75789327	75789553	UNK	0.0288303	0.0213699
1533	chr1	145382417	145382740	NBPF20	-0.0375223	0.0219264
3272	chr2	113993205	113994075	LINC01191	0.0486925	0.022578
10707	chr8	27737078	27737289	CCDC25	0.0228535	0.0234246
16935	chr13	114187104	114187469	CFAP97D2	0.0404913	0.023511
24481	chr19	52995941	52996595	ZNF702P	-0.0284923	0.0250926
24317	chr19	49699699	49700070	CPT1C	-0.0314906	0.0262552
3188	chr2	102803673	102804556	TMEM182	0.0150669	0.0264535
16874	chr13	113420153	113420384	ADPRHL1	0.0109731	0.0273216
13347	chr10	101874822	101875139	ARMH3	-0.00994849	0.027899
24586	chr19	55864131	55864379	NLRP4	0.016883	0.0290583
6086	chr4	132654303	132654698	LINC01256	0.0160866	0.0294753
22567	chr19	2352225	2352429	SPPL2B	0.0445258	0.0298396
5902	chr4	81109888	81110460	PRKG2	0.044158	0.0304558
20155	chr17	1808573	1808773	SMYD4	0.0318764	0.0332406
17233	chr14	54418678	54418881	CDKN3	-0.0264331	0.0334231
16332	chr12	132972696	132972941	NANOGNBP2	0.0215563	0.0340259
4718	chr3	98376317	98376542	AC117473.1	0.0226022	0.0341221
19216	chr16	28270453	28270674	AC138904.3	0.0156127	0.0342213
6397	chr5	667948	668589	TPPP	-0.0719689	0.0343365
17894	chr15	30654491	30654988	AC091057.6	0.00797011	0.0343742
22103	chr18	76541148	76541888	LINC00908	0.00946251	0.0350636
334	chr1	6514109	6516325	PLEKHG5	-0.0176983	0.0364895
12790	chr10	13043095	13043781	CCDC3	0.00423198	0.0368937
817	chr1	32892429	32892835	HPCA	0.0257907	0.0373691
6361	chr5	293626	294130	PDCD6	0.00708716	0.0376437
10494	chr8	1764329	1765171	CLN8	-0.0302194	0.0381493
21801	chr18	12432891	12433245	AP001029.1	0.00773069	0.0383615
23956	chr19	41386277	41386589	AC011462.1	0.052575	0.0385357
22372	chr19	1163467	1163876	SBNO2	0.00801299	0.0388766
8208	chr6	52441270	52441793	EFHC1	0.00796847	0.0396435
8748	chr6	168633707	168633918	SMOC2	0.00541171	0.0397632
13883	chr11	849088	850982	TSPAN4	0.0220213	0.0405808
18518	chr15	95388002	95388438	LINC00924	-0.00313411	0.0412758
12403	chr9	136834190	136834392	RABL6	0.00662041	0.0417727
14890	chr11	92702790	92703434	FAT3	-0.0237979	0.0421916
7423	chr5	176314452	176314662	SIMC1	-0.000740997	0.0428686
22714	chr19	3821060	3821446	ZFR2	0.006699	0.0437339
11941	chr9	98491390	98491697	GABBR2	0.0125662	0.0437794
12390	chr9	136419517	136419785	PMPCA	0.0106122	0.0438995
15266	chr12	6756002	6756679	MLF2	-0.00880952	0.0442864
16312	chr12	132853944	132854190	CHFR	0.0154438	0.044455
12720	chr10	1516980	1517313	ADARB2	0.0255775	0.0452553
22199	chr18	77623266	77624280	AC123786.1	-0.0193603	0.0457043
21761	chr18	8785434	8785644	MTCL1	0.0116425	0.0457118
203	chr1	2435042	2435257	PLCH2	0.0115913	0.0460207
23888	chr19	40376868	40377136	PLD3	-0.118254	0.0472789
17848	chr15	27083993	27084222	GABRG3	0.0317537	0.0475951
1562	chr1	146543988	146544439	HYDIN2	0.0247736	0.0486718
17709	chr14	105268486	105268763	BRF1	0.0085533	0.049118
9549	chr7	63211533	63211941	AC092001.1	0.012932	0.0496148
23772	chr19	37761411	37761828	ZNF573	0.0256383	0.0496317
19930	chr16	88706212	88706492	RNF166	0.0259541	0.0498345
13968	chr11	1986016	1986362	MRPL23-AS1	0.00362132	0.0499677

## Sheet: Legend
	id:	site id
	Chromosome:	chromosome of the site
	Start:	start coordinate of the region
	End:	end coordinate of the region
	Gene list:	associated gene symbol to the given region
	mean.mean.diff:	Mean difference in means across all sites in a region
	pvalue:	Combined pvalue aggregating pvalues of all sites in the region using a generalization of Fisher's method
